# Supplementary material for: Deciphering ion transport and ATPase coupling in the intersubunit tunnel of KdpFABC
Source: Springer Nature journal article supplement (doi:10.1038/s41467-021-25242-x), 2021-08-24
Supplement: MOESM1 [file 41467_2021_25242_MOESM1_ESM.pdf]

1 **Supplementary Data**

2 **Deciphering ion transport and ATPase coupling in the intersubunit tunnel**  
3 **of KdpFABC**

4 Jakob M Silberberg<sup>1</sup>, Robin A Corey<sup>2</sup>, Lisa Hielkema<sup>3</sup>, Charlott Stock<sup>1,4</sup>, Phillip J  
5 Stansfeld<sup>\*5</sup>, Cristina Paulino<sup>\*3</sup>, Inga Hänel<sup>\*1</sup>

6 <sup>1</sup>Institute of Biochemistry, Biocenter, Goethe University Frankfurt, Max-von-Laue-Straße 9,  
7 60438, Frankfurt/Main, Germany

8 <sup>2</sup>Department of Biochemistry, University of Oxford, South Parks Road, Oxford, OX1 3QU, United  
9 Kingdom

10 <sup>3</sup>Department of Structural Biology, Groningen Biomolecular Sciences and Biotechnology Institute,  
11 University of Groningen, Nijenborgh 7, 9747 AG, Groningen, The Netherlands

12 <sup>4</sup>Current address: DANDRITE, Nordic EMBL Partnership for Molecular Medicine, Department of  
13 Molecular Biology and Genetics, Aarhus University, Gustav Wieds Vej 10C, DK-8000 Aarhus C,  
14 Denmark

15 <sup>5</sup>School of Life Sciences & Department of Chemistry, University of Warwick, Coventry, CV4 7AL,  
16 United Kingdom

17 These authors contributed equally: Jakob M Silberberg, Robin A Corey, Lisa  
18 Hielkema.

19 Correspondence should be addressed to PJS ([phillip.stansfeld@warwick.ac.uk](mailto:phillip.stansfeld@warwick.ac.uk)),  
20 CP ([c.paulino@rug.nl](mailto:c.paulino@rug.nl)), or IH ([haenelt@biochem.uni-frankfurt.de](mailto:haenelt@biochem.uni-frankfurt.de)).

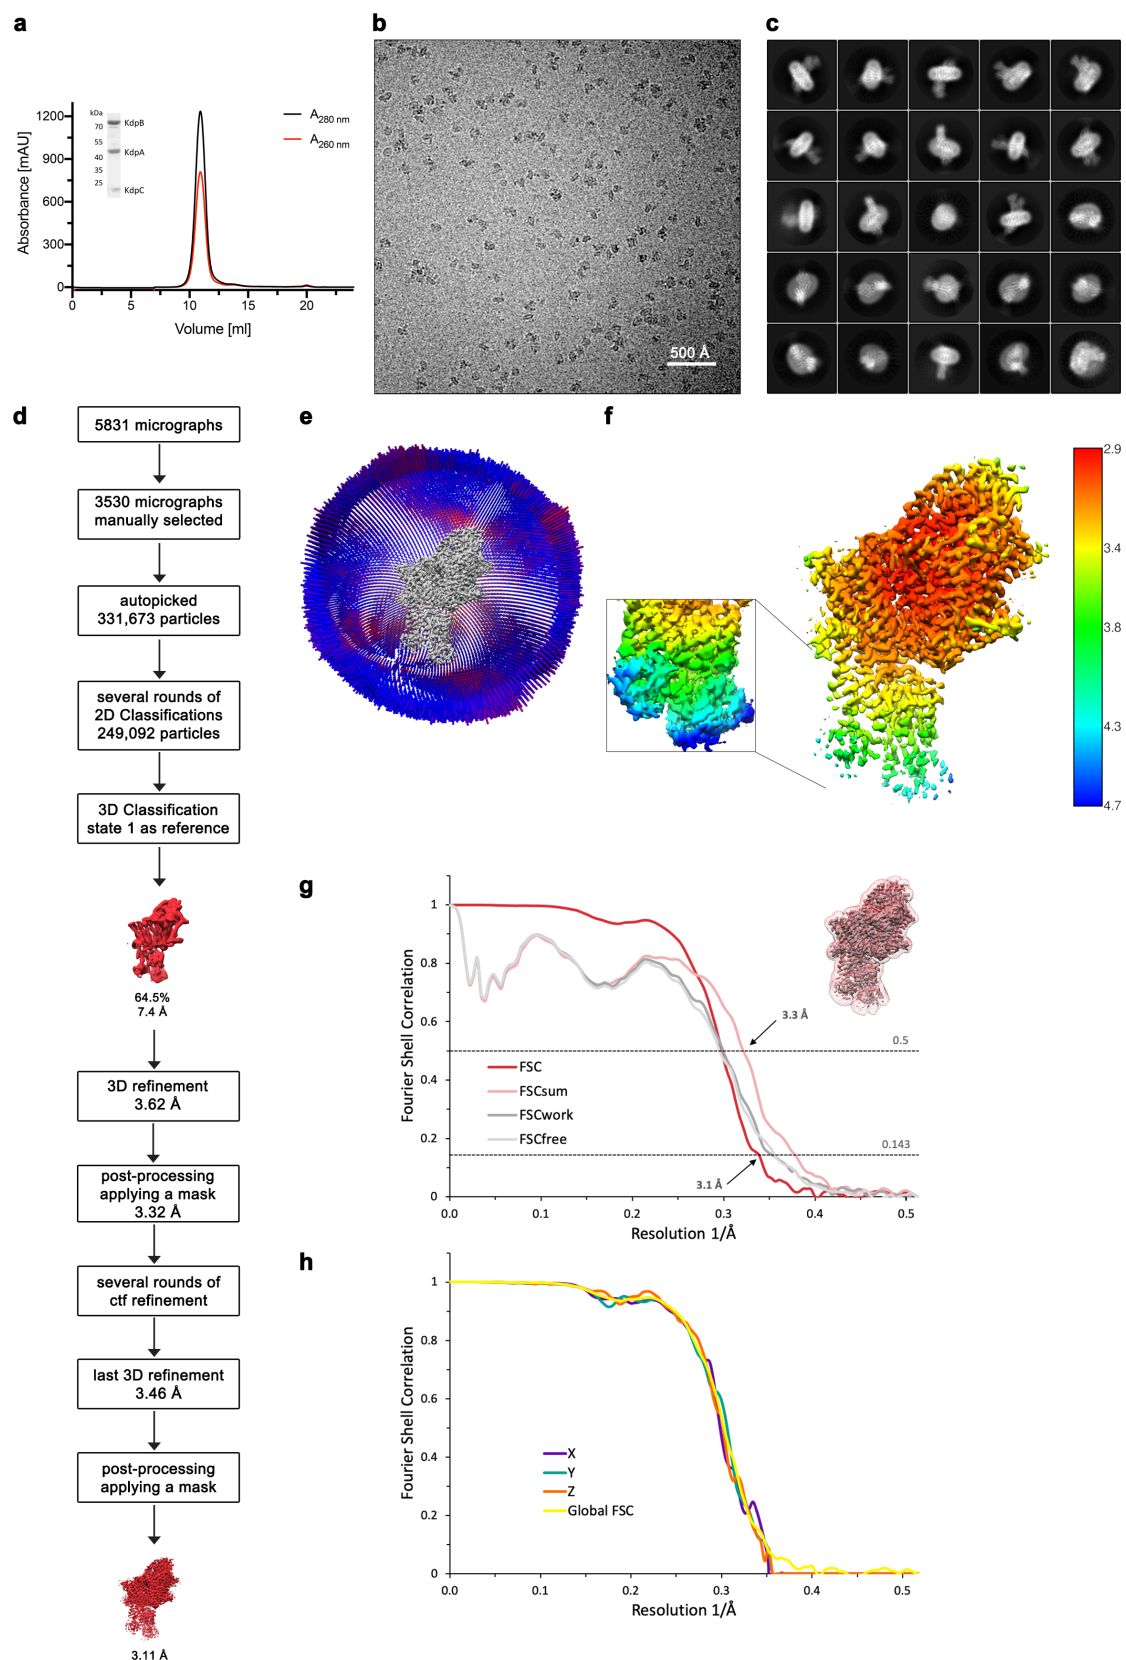

21

22 Supplementary Figure 1. **Cryo-EM analysis of K<sup>+</sup>-loaded KdpFAB<sub>D307N</sub>C in the E1-ATP state.**  
 23 **a**, Purification of KdpFAB<sub>D307N</sub>C. A representative SEC elution profile (Superdex 200 incr. 10/300)  
 24 and SDS-PAGE are shown. **b**, Representative micrograph of the recorded data from a dataset of  
 25 5831 images. **c**, 2D class averages of vitrified KdpFAB<sub>D307N</sub>C in the presence of 50 mM KCl and  
 26 5 mM AMPPCP, calculated from 249,092 particles. **d**, Image processing workflow as described in  
 27 the methods section. **e**, Angular distribution plot of particles included in the unsymmetrized 3D

28 reconstruction for KdpFABC. The number of particles with the respective orientation is  
29 represented by length and color of the cylinders (long and red – high number of particles; short  
30 and blue – low number of particles). **f**, Final reconstruction map colored by local resolution as  
31 estimated by RELION<sup>59</sup>. **g**, FSC plot used for resolution estimation and model validation. The  
32 gold-standard FSC plot between two separately refined half-maps is shown in red and indicates a  
33 final resolution of 3.1 Å. The FSC model validation curves for FSCsum, FSCwork and FSCfree, as  
34 described in the methods, are shown in light red, dark grey and light grey respectively. A  
35 thumbnail of the mask used for FSC calculation overlaid on the map is shown in the upper right  
36 corner. Dashed lines indicate the FSC thresholds used for FSC (0.143) and for FSCsum (0.5). **h**,  
37 Anisotropy estimation plot of the final map. The global FSC curve is represented in yellow. The  
38 directional FSCs along the x-, y- and z-axes are displayed in blue, green and red, respectively.

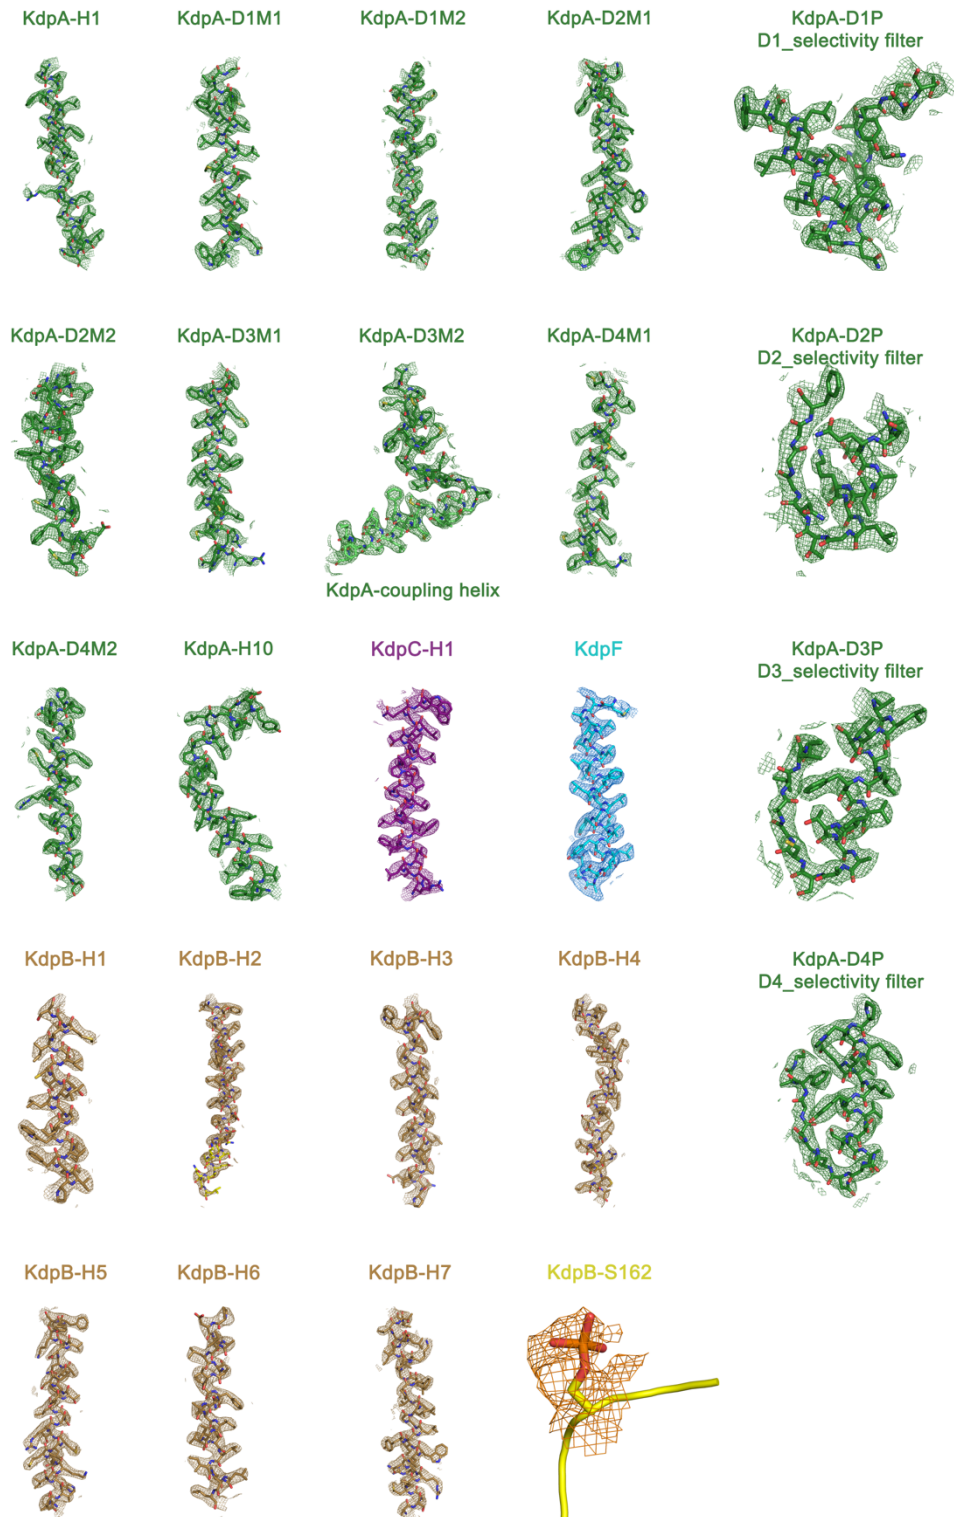

39  
 40 Supplementary Figure 2. **Cryo-EM densities of the membrane-inserted moieties and**  
 41 **mutated residues of KdpFAB<sub>D307N</sub>C.** TM helices 1-10 and selectivity filter pore loops of KdpA  
 42 (green), TM helices 1-7 of KdpB (sand), the phosphorylated KdpB<sub>S162</sub> (yellow), TM helix of KdpC  
 43 (purple), and KdpF (cyan) are fitted to the corresponding maps shown at 7 $\sigma$ .

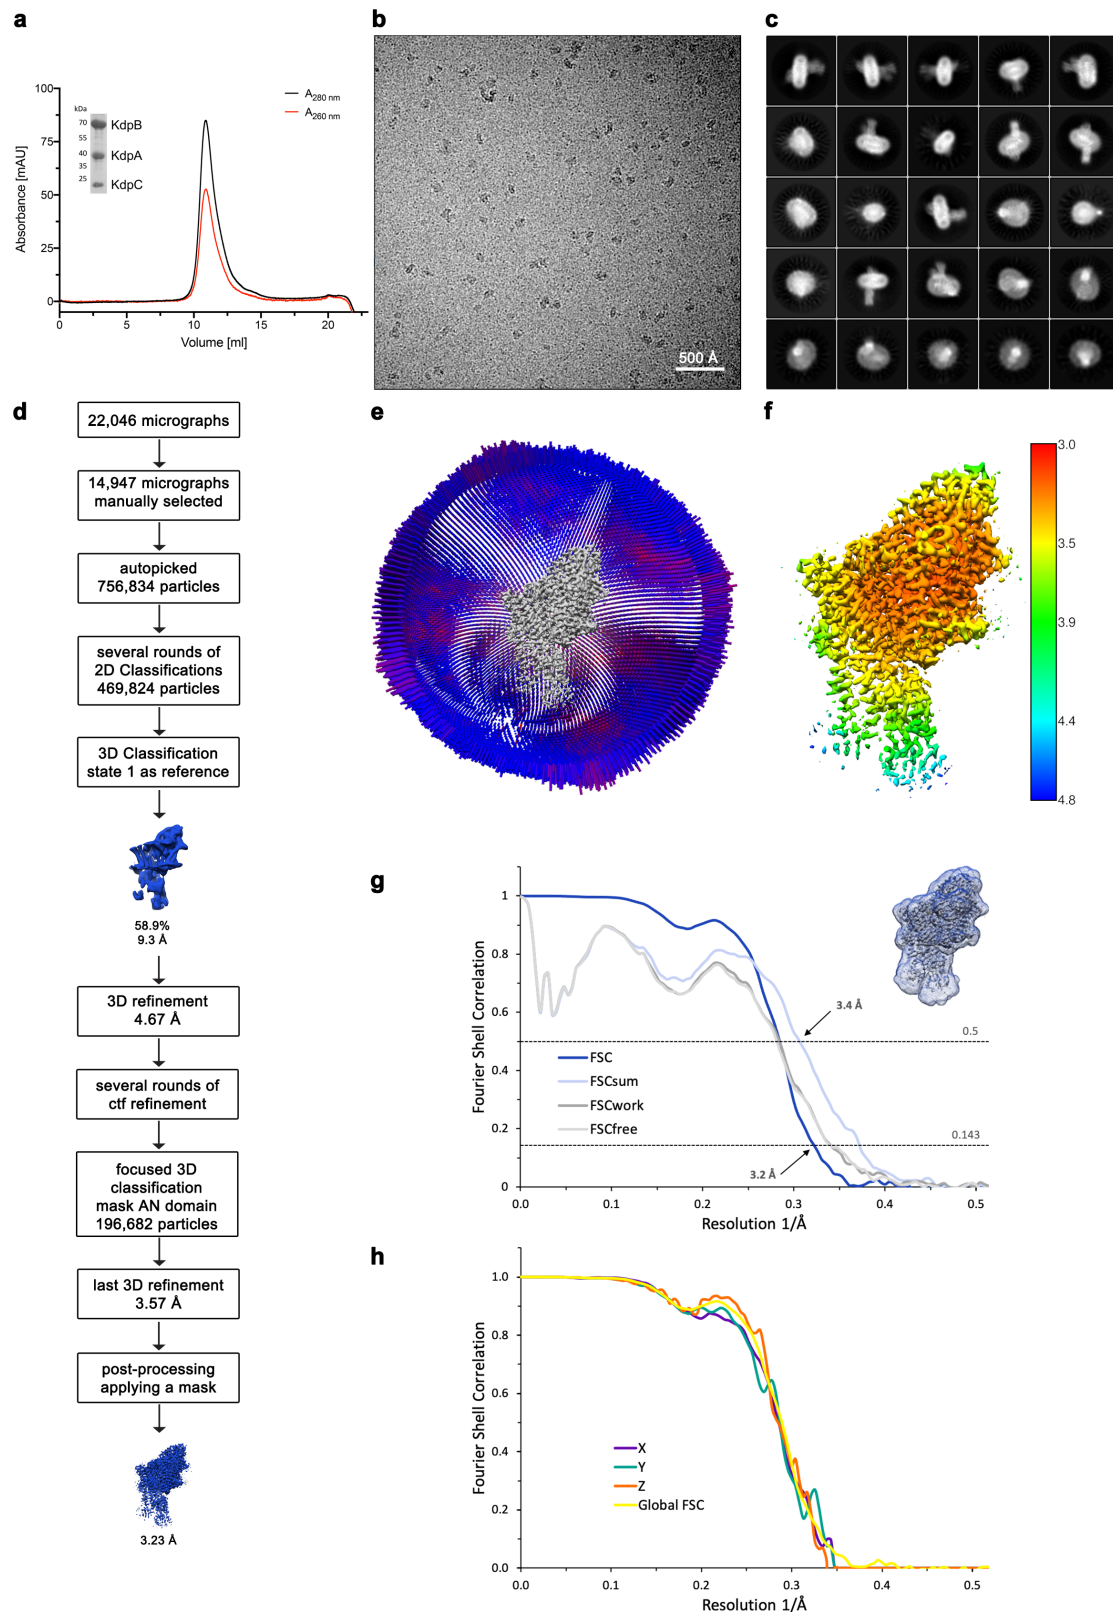

44

45 **Supplementary Figure 3. Cryo-EM analysis of Rb<sup>+</sup>-loaded KdpFAG<sub>232D</sub>BS<sub>162A</sub>C in the E1-ATP**  
 46 **state.** **a**, Purification of KdpFAG<sub>232D</sub>BS<sub>162A</sub>C. A representative SEC elution profile (Superdex 200  
 47 incr. 10/300) and SDS-PAGE are shown. **b**, Representative micrograph of the recorded data from  
 48 22,046 images. **c**, 2D class averages of vitrified KdpFAG<sub>232D</sub>BS<sub>162A</sub>C in the presence of 1 mM ATP,  
 49 100 mM RbCl, and 10 mM AMPPCP, calculated from 469,824 particles. **d**, Image processing  
 50 workflow as described in the methods section. **e**, Angular distribution plot of particles included  
 51 in the unsymmetrized 3D reconstruction for KdpFABC. The number of particles with the

52 respective orientation is represented by length and color of the cylinders (long and red – high  
53 number of particles; short and blue – low number of particles). **f**, Final reconstruction map  
54 colored by local resolution as estimated by RELION<sup>59</sup>. Notably, the local resolution in the A  
55 domain is lower than in the structure of KdpFAB<sub>D307N</sub>C, reflecting effects observed in other  
56 structures containing mutation KdpB<sub>S162A</sub>. This suggests that phosphorylation of this residue  
57 stabilizes the conformation of the A domain. **g**, FSC plot used for resolution estimation and model  
58 validation. The gold-standard FSC plot between two separately refined half-maps is shown in  
59 blue and indicates a final resolution of 3.2 Å. The FSC model validation curves for FSCsum,  
60 FSCwork and FSCfree, as described in the methods, are shown in light blue, dark grey and light  
61 grey respectively. A thumbnail of the mask used for FSC calculation overlaid on the map is shown  
62 in the upper right corner. Dashed lines indicate the FSC thresholds used for FSC (0.143) and for  
63 FSCsum (0.5). **h**, Anisotropy estimation plot of the final map. The global FSC curve is represented  
64 in yellow. The directional FSCs along the x-, y- and z-axes are displayed in blue, green and red,  
65 respectively.

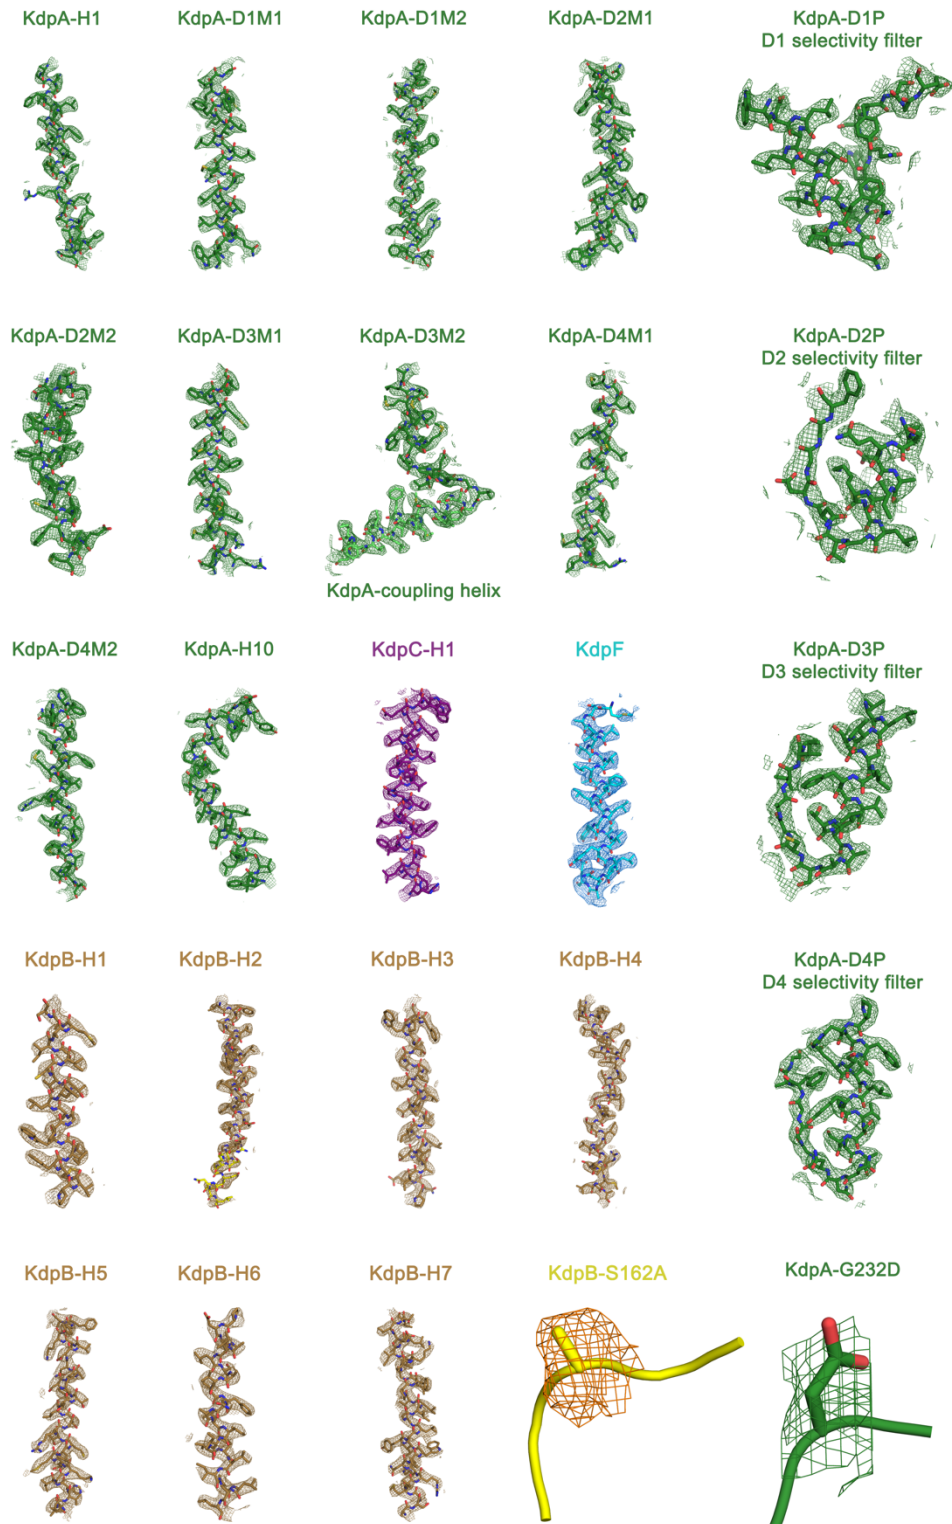

66

67 Supplementary Figure 4. **Cryo-EM densities of the membrane-inserted moieties and**  
 68 **mutated residues of KdpFA<sub>G232D</sub>B<sub>S162A</sub>C.** TM helices 1-10 and selectivity filter pore loops of  
 69 KdpA (green), the mutated SF residue KdpA<sub>G232D</sub>, TM helices 1-7 of KdpB (sand), the  
 70 phosphorylation-free KdpB<sub>S162A</sub> (yellow), TM helix of KdpC (purple), and KdpF (cyan) are fitted  
 71 to the corresponding maps shown at 7σ.

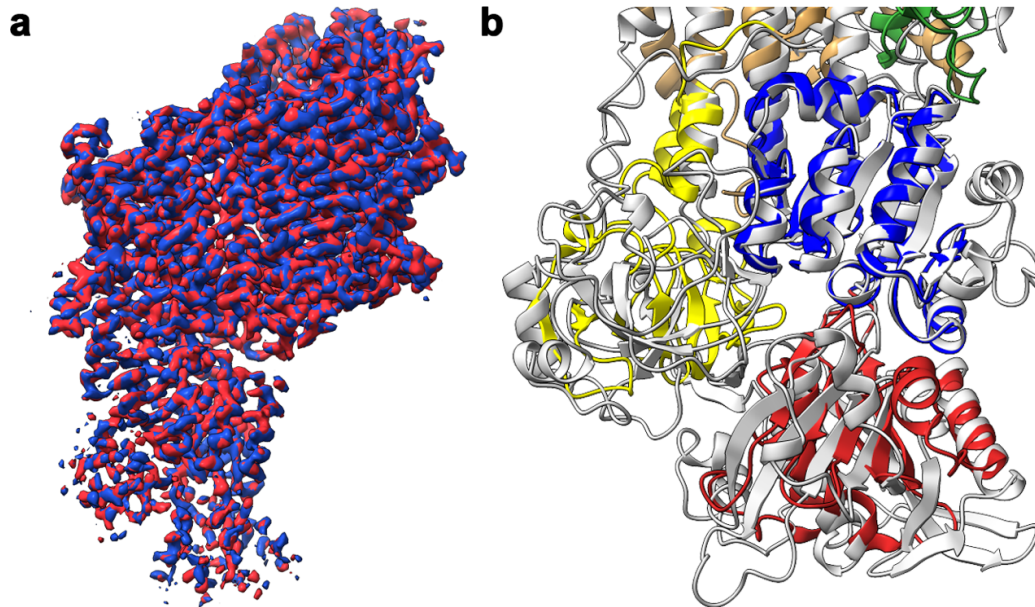

72  
73  
74  
75  
76  
77  
78

Supplementary Figure 5. **Conformational assignment of the presented KdpFABC structures.**  
**a**, Overlay of the cryo-EM maps generated for KdpFAB<sub>D307N</sub>C (red) and KdpFA<sub>G232D</sub>B<sub>S162A</sub>C (blue), indicating an identical conformation in all regions of the complex. **b**, Overlay of the cytosolic domains from the K<sup>+</sup>-loaded structure of KdpFAB<sub>D307N</sub>C with AMPPCP and SERCA in an E1-ATP conformation [4XOU] (gray), verifying the assignment of the E1-ATP conformation to both structures presented here.



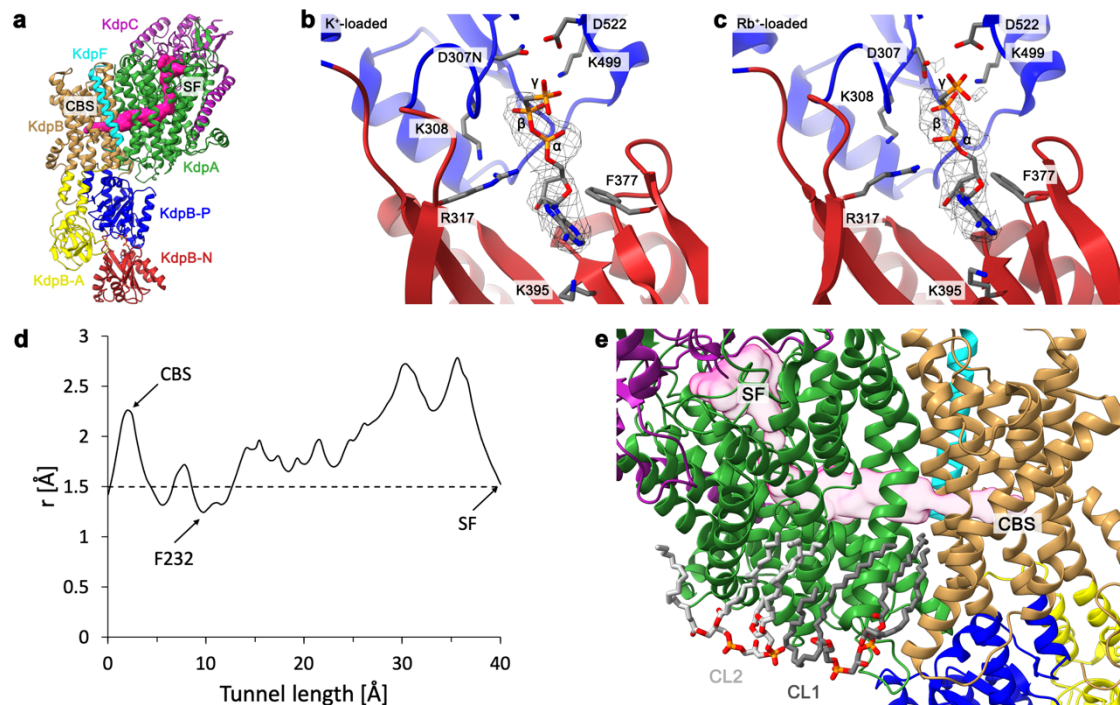

79  
80 Supplementary Figure 6. **Structural features in the E1·ATP state.** **a**, Structural model of  
81 KdpFA<sub>G232D</sub>B<sub>S162A</sub>C in the ribbon representation. The KdpA pore entrance at the SF and  
82 intersubunit tunnel leading to the CBS are visualized as a pink surface. **b** and **c**, Nucleotide analog  
83 AMPPCP in the K<sup>+</sup>- and Rb<sup>+</sup>-loaded sample, respectively, modeled into its density (mesh),  
84 coordinated between the N and P domains, as was previously observed in other E1·ATP  
85 structures<sup>11</sup>. **d**, Radius of the intersubunit tunnel in Rb<sup>+</sup>-loaded KdpFA<sub>G232D</sub>B<sub>S162A</sub>C. Like in the  
86 K<sup>+</sup>-loaded sample, the tunnel is wide enough to permit K<sup>+</sup> ( $r=1.4$  Å, dashed line), with a  
87 constriction at the KdpA SF and at KdpB<sub>F232</sub>. **e**, Cardiolipin molecules CL1 and CL2 (dark and light  
88 grey, respectively) modeled in the cryo-EM structure of KdpFA<sub>G232D</sub>B<sub>S162A</sub>C.

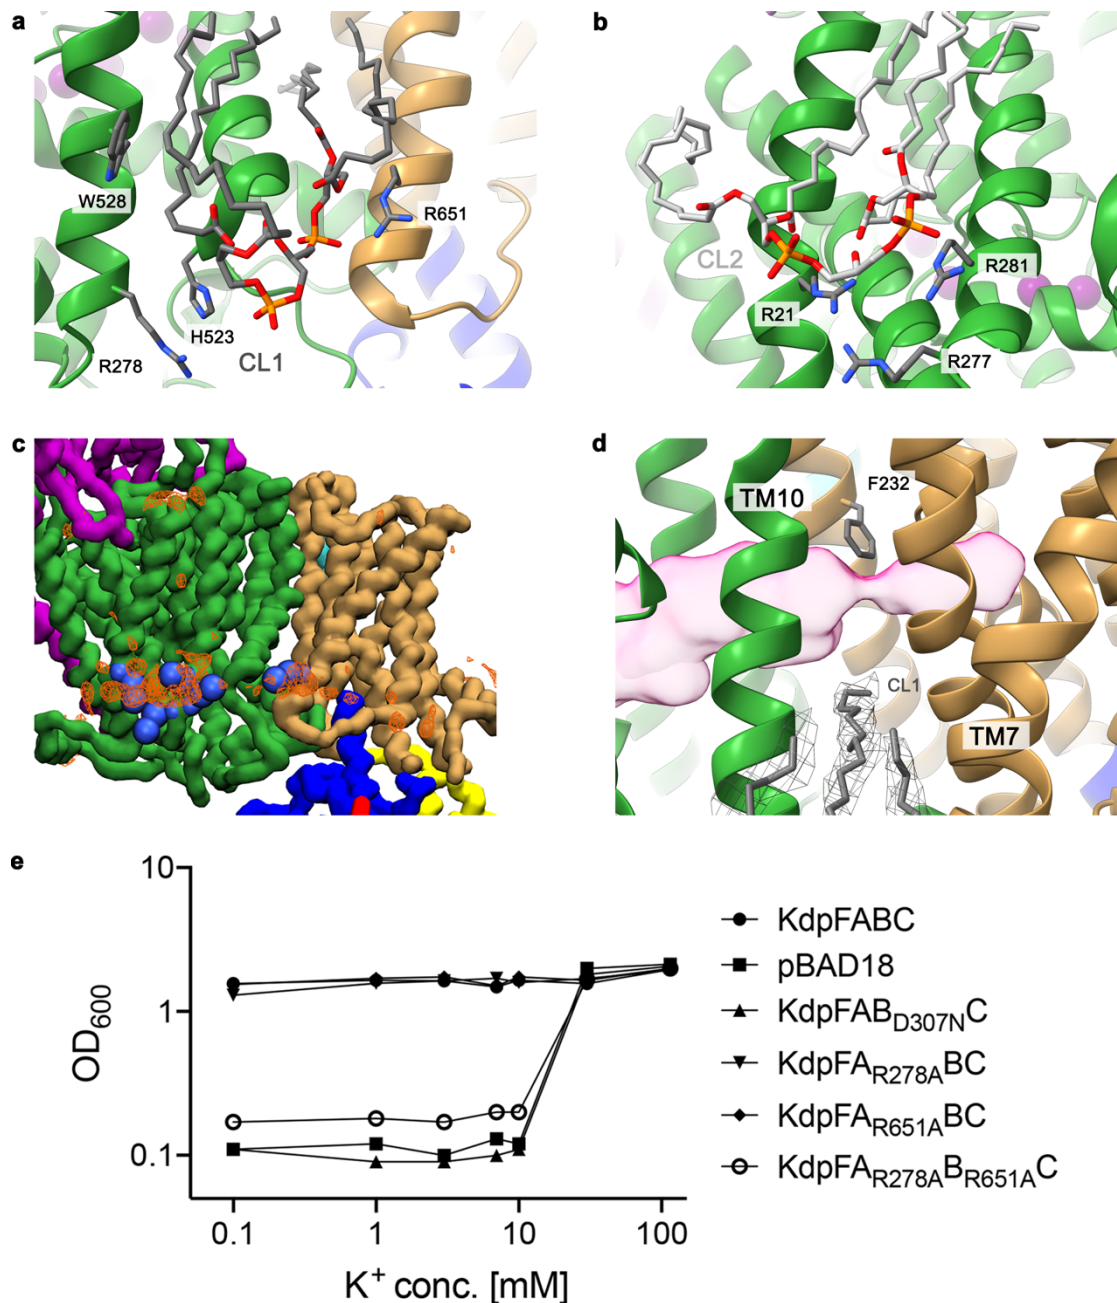

89  
 90 Supplementary Figure 7. **KdpFABC and cardiolipin.** **a**, CL 1 is coordinated by KdpA<sub>R278</sub>,  
 91 KdpA<sub>W285</sub>, KdpA<sub>H523</sub>, and KdpB<sub>R651</sub>. **b**, The headgroup of CL2 is coordinated by KdpA<sub>R21</sub>, KdpA<sub>R277</sub>,  
 92 and KdpA<sub>R281</sub>. **c**, Identified arginine residues (blue spheres) with high CL binding propensity, as  
 93 per Figure 2 b. The computed density for the CL molecules from the coarse-grained simulation  
 94 data is shown as orange mesh. **d**, The hydrocarbon tail of CL1 that extends into the complex at  
 95 the KdpA/KdpB interface lies below the path of the intersubunit tunnel at the site of constriction  
 96 by KdpB<sub>F232</sub>. **e**, Growth complementation assays for the analysis of the dependence of KdpFABC  
 97 on cardiolipin. Growth measured by OD<sub>600</sub> after 24 h. Residues KdpA<sub>R278</sub> and KdpB<sub>R651</sub>, which  
 98 were identified by MD analysis as CL1 coordinating residues, were mutated to alanine to impair  
 99 CL binding at the KdpA/KdpB interface. This double variant was unable to complement *E. coli*  
 100 LB2003 cell growth under K<sup>+</sup> limitation, indicating a lack of K<sup>+</sup> translocation by the complex. In  
 101 contrast, mutating the individual residues showed no effect. The data show an example of three  
 102 biological replicates.

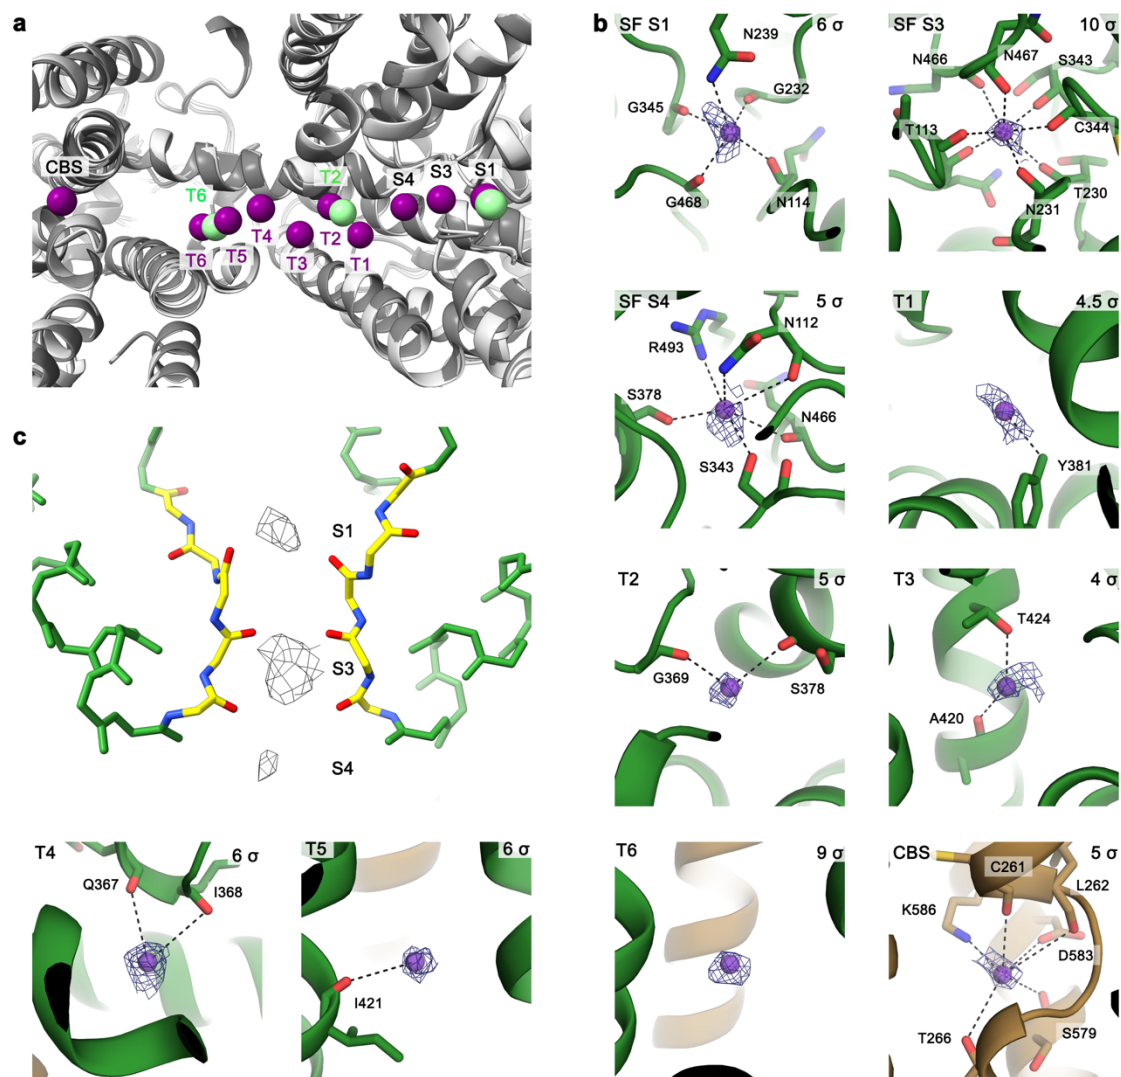

103  
 104  
 105  
 106  
 107  
 108  
 109  
 110  
 111  
 112  
 113

Supplementary Figure 8. **Ion coordination in K<sup>+</sup>-loaded KdpFAB<sub>D307N</sub>C.** **a**, Comparison of ion positions in the E1 structure [6HRA] and the K<sup>+</sup>-loaded E1-ATP structure. K<sup>+</sup> ions in [6HRA] shown in green, newly identified K<sup>+</sup> ions in purple. The increased resolution and K<sup>+</sup> concentrations likely allow for the identification of additional densities. **b**, Coordination of K<sup>+</sup> ions in the intersubunit tunnel. Dashed lines represent important protein-ion interactions to the transport process. KdpA<sub>R493</sub> repels the ion into the intersubunit tunnel immediately below the SF (panel 'SF S4'). No coordinating residues were identified for T6. Cryo-EM densities (mesh) shown with contour levels indicated in top right corner of each panel. Distances of coordinating residues are listed in Supplementary Table 2. **c**, SF of K<sup>+</sup>-loaded KdpFAB<sub>D307N</sub>C. Ion densities (mesh) in the S1, S3 and S4 sites are shown at 6  $\sigma$ .

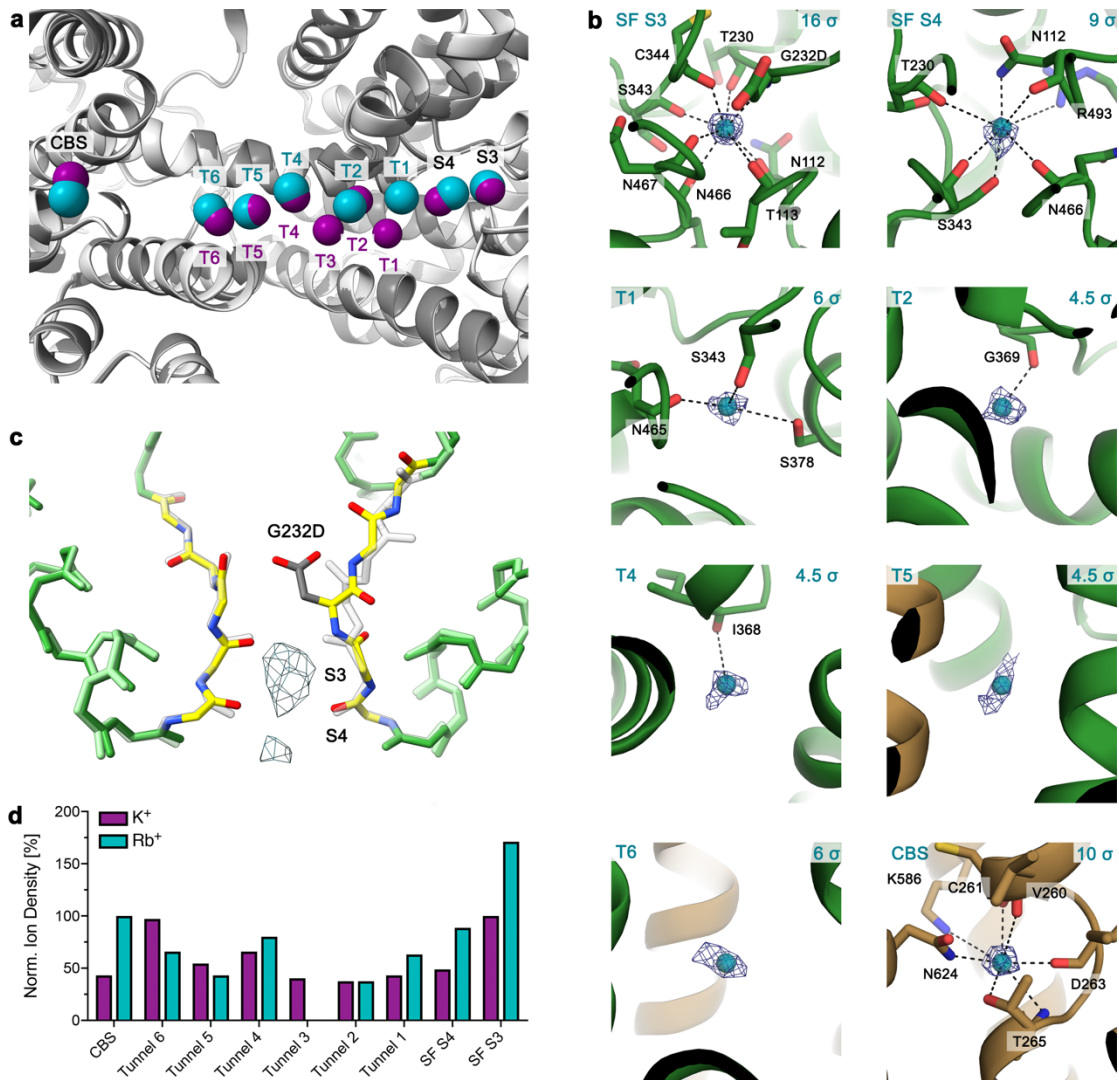

114

115 Supplementary Figure 9. **Ion coordination in Rb<sup>+</sup>-loaded KdpFAG<sub>232D</sub>BS<sub>162A</sub>C.** **a**, Comparison of  
 116 ion positions in Rb<sup>+</sup>- and K<sup>+</sup>-loaded E1-ATP structures of KdpFABC. Rb<sup>+</sup> ions shown in turquoise,  
 117 K<sup>+</sup> ions in purple. Well-coordinated positions at the beginning and end of the intersubunit tunnel  
 118 show a high correlation between the two structures, while positions between these optima with  
 119 fewer coordinating residues show a higher deviation. Tunnel ion T3 was only identified in the K<sup>+</sup>-  
 120 loaded structure. **b**, Coordination of Rb<sup>+</sup> ions in the intersubunit tunnel. Dashed lines represent  
 121 important protein-ion interactions to the transport process. KdpA<sub>R493</sub> repels the ion into the  
 122 intersubunit tunnel immediately below the SF (panel 'SF S4'). No coordinating residues were  
 123 identified for Tunnel ions T5 and T6. Cryo-EM densities (mesh) shown with contour levels  
 124 indicated in top right corner of each panel. Distances of coordinating residues are listed in  
 125 Supplementary Table 2. **c**, SF of KdpFAG<sub>232D</sub>BS<sub>162A</sub>C shown in color, with wild-type SF from  
 126 KdpB<sub>D307N</sub> underlaid in grey. The side chain of KdpAG<sub>232D</sub> inserts into SF coordination sites S1 and  
 127 S2, blocking ion binding at these positions and possibly explaining the lowered affinity of  
 128 KdpFAG<sub>232D</sub>BC for ion substrates<sup>8,9</sup>. At the same time, the side chain adds a new coordination  
 129 moiety to coordination site S3, changing the coordination geometry and explaining the reduced  
 130 selectivity of the variant permitting Rb<sup>+</sup> passage through the SF. Ion densities (mesh) were  
 131 observed in the S3 and S4 sites in the Rb<sup>+</sup>-loaded structure of KdpFAG<sub>232D</sub>BS<sub>162A</sub>C. **d**, Density  
 132 comparison of Rb<sup>+</sup> and K<sup>+</sup> positions identified in K<sup>+</sup>- and Rb<sup>+</sup>-loaded KdpFABC, normalized to the  
 133 K<sup>+</sup> density in SF S3. Both electron density maps were low-pass filtered to a resolution of 3.2 Å for  
 134 comparison.

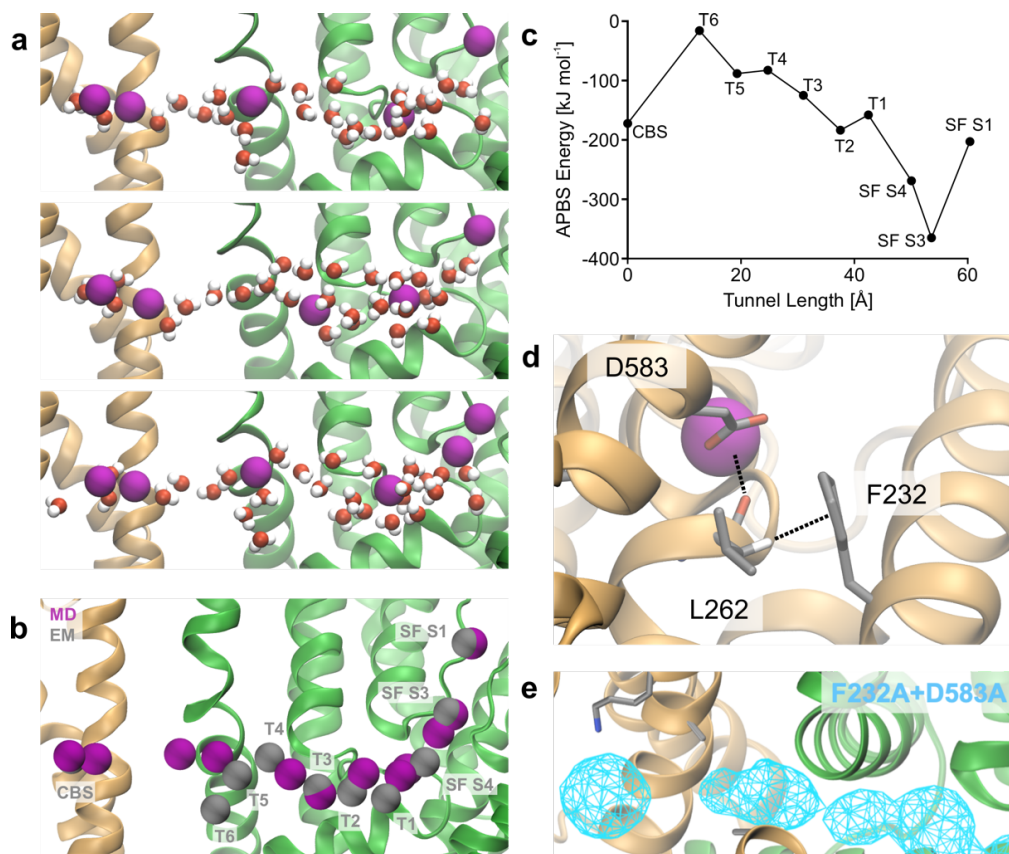

135

136 Supplementary Figure 10. **Analysis of ion occupancy in the intersubunit tunnel by MD**  
 137 **simulations.** **a**, Snapshots of atomistic MD simulations showing unstructured waters aiding K<sup>+</sup>  
 138 coordination in the intersubunit tunnel. **b**, Overlay of all positions used for APBS analysis of MD-  
 139 relaxed ion positions (purple), compiled from multiple snapshots. The input ion coordinates from  
 140 cryo-EM are shown in gray. **c**, Coordination energy of ion positions from cryo-EM without MD  
 141 relaxation by Adaptive Poisson-Boltzmann Solver (APBS) analysis. All positions observed in the  
 142 cryo-EM structure are energetically favorable, although positions T4-T6 are less so, and are  
 143 immediately abandoned in MD simulations. **d**, Coordination near KdpB<sub>D583</sub> aided by the backbone  
 144 carbonyl of KdpB<sub>L262</sub>, which is in turn CH- $\pi$  stacked with KdpB<sub>F232</sub>. **e**, Ion progression through  
 145 intersubunit tunnel in atomistic MD simulations of KdpFAB<sub>F232A/D583A</sub>. Removal of the steric  
 146 hindrance of the phenylalanine allows ion passage of K<sup>+</sup> even in the absence of the KdpB<sub>D583</sub>  
 147 energy well.

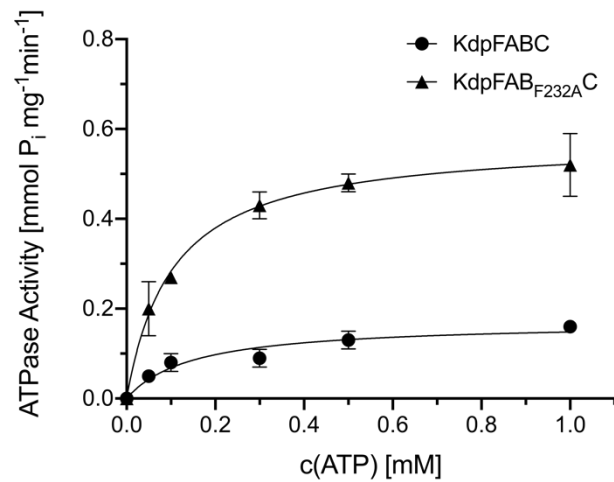

149

150 Supplementary Figure 11. **Michaelis-Menten kinetics of ATP hydrolysis by KdpFABC and**  
 151 **KdpFAB<sub>F232A</sub>C.** Michaelis-Menten kinetics of KdpFABC ATP turnover, showing no effect of the  
 152 mutation KdpB<sub>F232A</sub> on the apparent affinity for ATP ( $K_{m,ATP}$  0.15 mM for KdpFABC, 0.10 mM for  
 153 KdpFAB<sub>F232A</sub>C) but a threefold increase in the  $V_{max}$  (0.17 mmol P<sub>i</sub> mg<sup>-1</sup>min<sup>-1</sup> for KdpFABC, 0.58  
 154 mmol P<sub>i</sub> mg<sup>-1</sup>min<sup>-1</sup> for KdpFAB<sub>F232A</sub>C). This demonstrates that the observed increase in ATPase  
 155 rate is not caused by an increased affinity for ATP. Data points represent the average, and error  
 156 bars indicate the standard deviation from technical triplicate measurements.

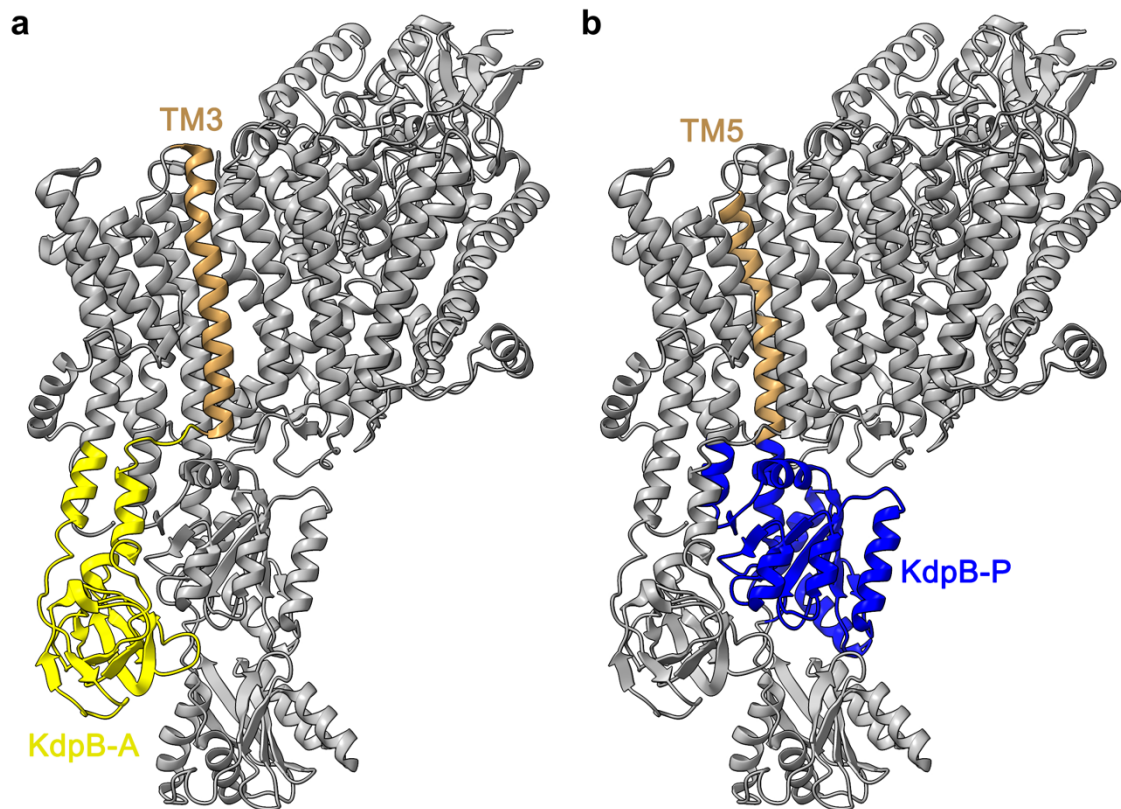

157

158 **Supplementary Figure 12. Connection of helices containing residues involved in ATPase**  
 159 **coupling to the cytosolic domains of KdpB.** KdpFABC in the ribbon conformation, with  
 160 relevant TM helices and cytosolic domains of KdpB highlighted. KdpF is excluded for visibility. **a,**  
 161 KdpB TM3, which harbors KdpB<sub>F232</sub>, is connected to the A domain, providing the structural basis  
 162 for the proposed regulation of A domain plasticity by this residue. **b,** KdpB TM5 contains  
 163 KdpB<sub>D583/K586</sub>, which are proposed to be responsible for stimulation of ATP hydrolysis, and is  
 164 connected to the P domain, which enacts ATP hydrolysis. Conformational rearrangements of  
 165 these residues can thus be allosterically transferred to the P domain to initiate  
 166 autophosphorylation.

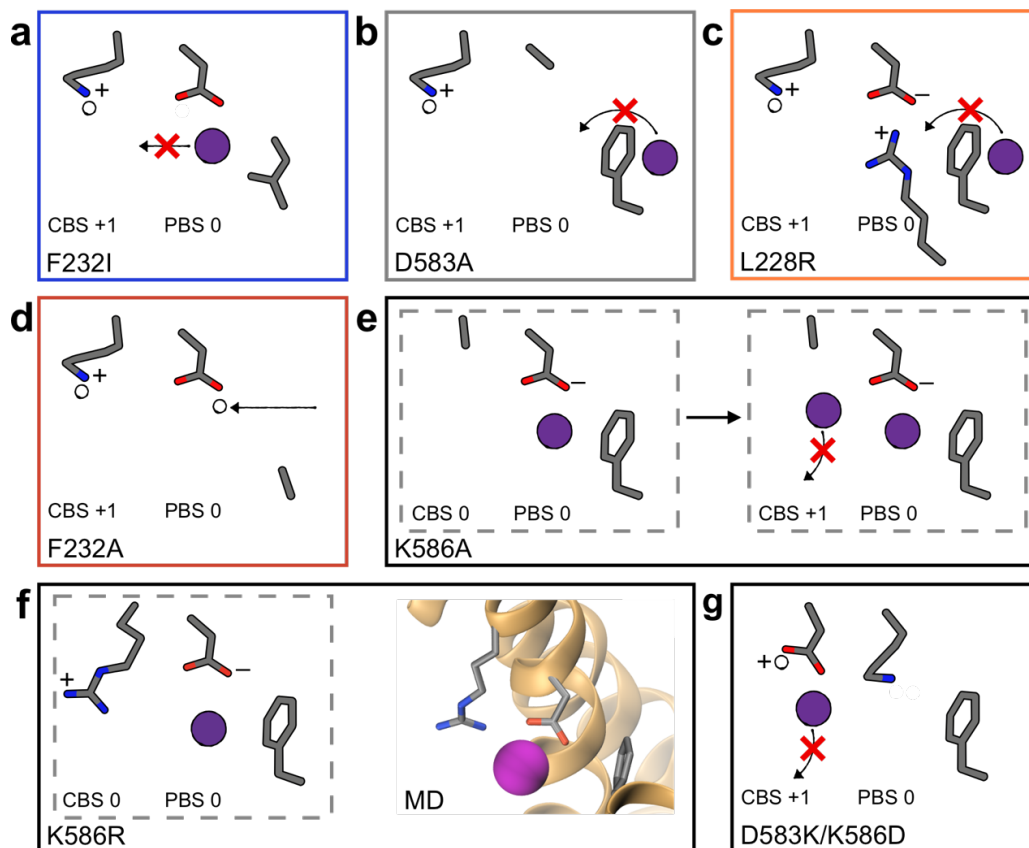

167

168 Supplementary Figure 13. **Explanation of mutation phenotypes in the context of our**  
 169 **mechanistic model.** **a**, KdpB<sub>F232I</sub> shows wild-type levels of ATP hydrolysis and K<sup>+</sup>-dependence,  
 170 but a slower transport rate. This is due to the loss of cation- $\pi$  interactions with the phenylalanine  
 171 side chain, preventing ion forwarding to the CBS, whilst the isoleucine side chain still constitutes  
 172 a steric hurdle in the tunnel. **b**, KdpB<sub>D583A</sub> has constitutive ATPase activity, independent of K<sup>+</sup> and  
 173 with an increased resistance to orthovanadate, and abolishes transport<sup>32</sup>. In this variant, the net  
 174 charge in the CBS is +1, leading to constant ATPase activity, even without K<sup>+</sup>. Furthermore, the  
 175 charge at the PBS is lost, meaning K<sup>+</sup> is not pulled past KdpB<sub>F232</sub>, explaining the lack of transport.  
 176 The E2/E1 transition is accelerated, possibly because the displacement of ions from the CBS in  
 177 the E2 state no longer needs to take place. **c**, Like KdpB<sub>D583A</sub>, KdpB<sub>L228R</sub> causes orthovanadate-  
 178 resistant ATP activity uncoupled from K<sup>+</sup>, no transport, and an accelerated E2/E1 transition. This  
 179 is likewise due to a neutralization of the PBS. Ion progression from the intersubunit tunnel is  
 180 prevented by neutralization of the energy well at the PBS, explaining the lack of transport. No  
 181 ions reach the CBS, likely accelerating the E2/E1 transition. **d**, KdpB<sub>F232A</sub> leads to an increased  
 182 ATPase rate independent of K<sup>+</sup> and a slowed transport rate. The loss of the phenylalanine side  
 183 chain removes the gatekeeper for the PBS, allowing unspecific protonation of the aspartate from  
 184 unspecified donors in the intersubunit tunnel. This leads to a neutralization of charges in the PBS,  
 185 stimulating ATP hydrolysis in the absence of K<sup>+</sup>. Protonation of KdpB<sub>D583</sub> also neutralizes the  
 186 energy well, decelerating ion progression towards the CBS, in part explaining the slower  
 187 transport rate. Additionally, cation- $\pi$  interactions required for ion forwarding are lost, also  
 188 contributing to the lowered transport rate. The increase in ATPase activity may be due to  
 189 deregulation of the A domain by the loss of the sterically demanding side chain in the  
 190 intersubunit tunnel. **e**, KdpB<sub>K586A</sub> significantly reduces the ATPase activity of the complex,  
 191 although the remaining activity is still dependent on K<sup>+</sup><sup>91</sup>. No transport was observed. A single  
 192 ion entering the PBS in this variant gives a net charge of 0, meaning there is no ATPase  
 193 stimulation. However, this variant in principle could allow two ions to pass KdpB<sub>F232</sub>, with one  
 194 ion binding at the CBS and one at the PBS. This is expected to be a rare occurrence explaining the  
 195 low level of K<sup>+</sup>-stimulated ATP hydrolysis. However, displacement of the CBS ion in the E2 state is  
 196 impossible due to the loss of the KdpB<sub>K586</sub> side chain, resulting in the lack of transport. **f**,  
 197 KdpB<sub>K586R</sub> shows wild-type levels of ATP hydrolysis, K<sup>+</sup>-dependence, and transport<sup>32,91</sup>. While a  
 198 protonation inversion with the arginine side chain is less likely than with lysine, the arginine is  
 199 able to aid coordination of the CBS ion with the face of its delocalized electron system (left panel),



200 and is long enough to potentially form a salt bridge with KdpB<sub>D583</sub> instead of switching  
201 protonation states. This is supported by MD simulations (right panel). **g**, Most puzzling are the  
202 results from the inversion of the CBS dipole (KdpB<sub>D583K/K586D</sub>), which resulted in normal ATPase  
203 activity but abolished transport<sup>91</sup>. It is possible that the double mutation causes significant  
204 rearrangements in the CBS, changing the behavior of ions in this section of the complex. If a K<sup>+</sup>  
205 ion somehow reaches into the CBS, possibly pulled by the negatively charged KdpB<sub>K586D</sub>, a  
206 subsequent protonation switch would establish the charge distribution required for ATP  
207 hydrolysis. At the same time, the lysine side chain required for ion displacement is lost,  
208 explaining the lack of transport by this variant.

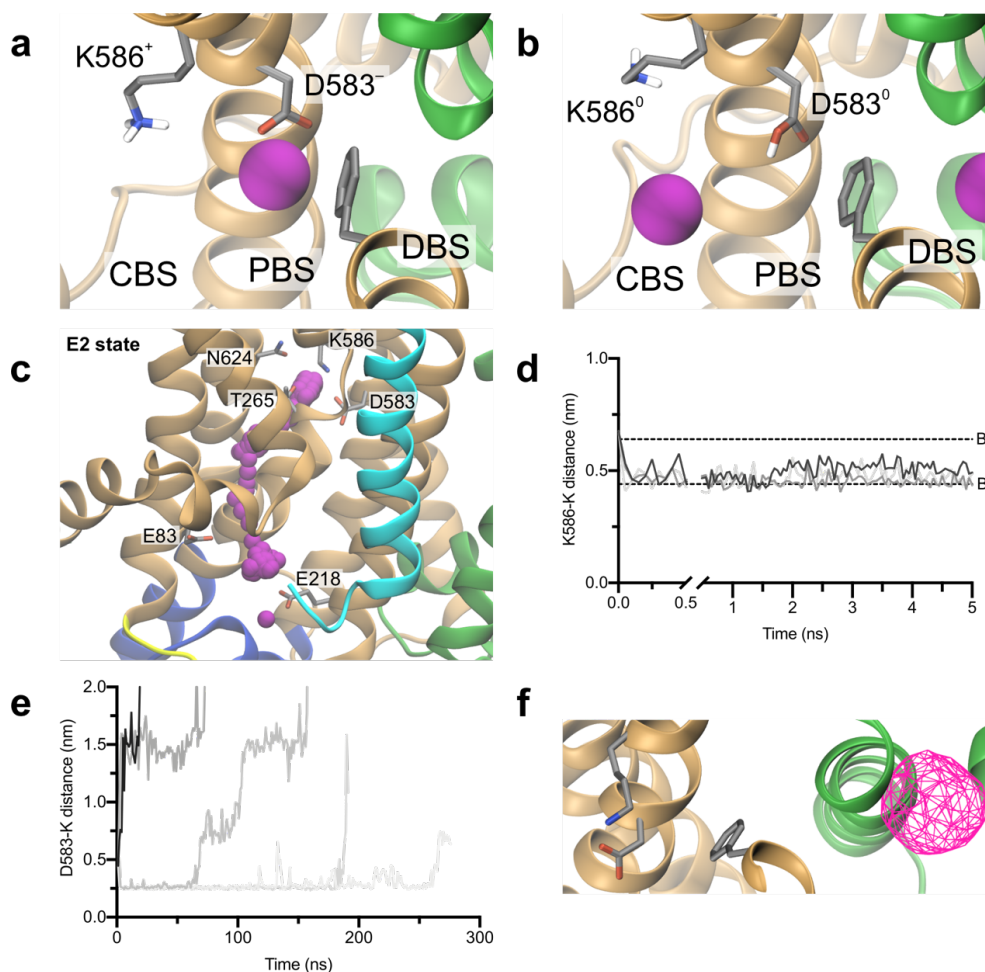

209

210 **Supplementary Figure 14. Progression of ions between different steps of the transport cycle**  
 211 **in MD simulations. a and b,** Atomistic MD simulations of ion behavior in different charge states  
 212 of the CBS in the E1-ATP state. **a,** Snapshots of the DBS, PBS and CBS in the E1 ground state, with  
 213 both KdpB<sub>D583</sub> and KdpB<sub>K586</sub> charged. The ion is stably bound by KdpB<sub>D583</sub>, supported by  
 214 KdpB<sub>F232</sub>. **b,** When protonation between KdpB<sub>D583/K586</sub> is inverted (both neutral) and a second ion  
 215 approaches the other face of KdpB<sub>F232</sub>, the first ion is repelled forward and stably occupies the  
 216 CBS. **c, d, e,** and **f,** Atomistic MD simulations of ion behavior in the CBS and intersubunit tunnel  
 217 in the E2 conformation. Simulations were run using the 2.9 Å resolution E2-P<sub>i</sub> structure [7BGY]. **c,**  
 218 Sequential ion positions showing the smoothed ion release pathway from the CBS in a single  
 219 simulation of the E2 state. In this conformation, ions in the CBS are released from the complex  
 220 through an inward-open half-channel. Ions placed in the CBS exit the complex without entering  
 221 the previously proposed low-affinity release site adjacent to the CBS. Ions placed in this site  
 222 rapidly move back to the CBS before following the same exit route. **d,** Timescales of K<sup>+</sup> occupancy  
 223 of the low-affinity (B2) site in the E2 state from three simulations. Ions rapidly leave the B2 site  
 224 towards the first observed CBS site (Bx), where occupancy is more stable. **e,** Timescales of ion  
 225 release from the CBS in the E2 state from five simulations. Ion displacement from the CBS can  
 226 take up to 250 ns or longer. **f,** Ion progression through the intersubunit tunnel in atomistic MD  
 227 simulations of the E2 state. Alternating access is facilitated by a constriction at the KdpA/KdpB  
 228 interface, which prevents ions from the intersubunit tunnel from progressing towards the CBS.

|                                       |     |           |                |                           |          |         |     |
|---------------------------------------|-----|-----------|----------------|---------------------------|----------|---------|-----|
|                                       |     |           | ▼              |                           |          |         |     |
| P03960 - <i>E. coli</i>               | 204 | IAMVEGAQR | RKTPNEIALTILLI | IALTIVFLLATATLWPFSAWGGNA  | 249      |         |     |
| Q7NN40 - <i>G. violaceus</i>          | 219 | IALIEGAKR | RQKTPNEIALTVLL | AVLTLIFLIVVATLPPFAAFVGGAP | 264      |         |     |
| B0R9M0 - <i>H. salinarum</i>          | 209 | IGLVEDAQ  | RQKTPNEIAMTILL | SGLTLVFVVAVATMFFGEYLASF   | 254      |         |     |
| A0A0H3C7Y6 - <i>C. vibrioides</i>     | 211 | IAMVEGADR | RRKTPNEIALAVLL | AGLTLIFLIAVVTLLGPGKFSGVA  | 256      |         |     |
| P63682 - <i>M. bovis</i>              | 221 | IALVEGAAR | QQTTPNEIALNILL | AGLTLIFLLAVVTLQPF         | FAIYSGGG | 266     |     |
| P57699 - <i>H. salinarum</i>          | 209 | IGLVEDAQ  | RQKTPNEIAMTILL | SGLTLVFVVAVATMFFGEYLASF   | 254      |         |     |
| B0JJ96 - <i>M. aeruginosa</i>         | 229 | ISLVEGAER | TKTPNEIALTVLL  | AVLTQVFLIVVATIPPIGNYIAGF  | 274      |         |     |
| Q6GKN3 - <i>S. aureus</i>             | 201 | IGLVEGATR | KTPNEIALFTLL   | MTLTIIFLVVILTMYP          | IAKFLNFN | 246     |     |
| Q725T7 - <i>D. vulgaris</i>           | 199 | IALVEGAER | RKTPNEIALNILL  | AGLTLIFILAVTTLKPMALFHGAR  | 244      |         |     |
| Q8YPE9 - <i>Nostoc sp.</i>            | 226 | IALVEGAER | SKTPNEI        | VALTVLLAVLSLVFLFVIATLP    | FAIYADTP | 271     |     |
| Q02CX6 - <i>S. usitatus</i>           | 220 | IALVEGAQR | RQKTPNEIALNIVI | AGLTLVFLAVVTLQPF          | FAIYSVAT | 265     |     |
| P73867 - <i>S. usitatus</i>           | 218 | IDLVEGAER | SKTPNEIALTVLL  | AVLTLVFLIVVATLPP          | PANYIDSP | 263     |     |
| C8WRA9 - <i>A. acidocaldarius</i>     | 205 | IALVEGASR | RQKTPNEIALSVLL | AGLTLIFLIVIDCLPPIAKGLGAH  | 250      |         |     |
| C1FA48 - <i>A. capsulatum</i>         | 205 | IALVEGTQR | RQKTPNEIALNILL | AGLTLIFLLAVVTLQPF         | FAIYSGAP | 250     |     |
| B1MDL0 - <i>M. abscessus</i>          | 203 | IALVEGASR | RQKTPNEIALNILL | ASLTIIFLLAVVALGPMGNYGGEQ  | 248      |         |     |
| B7JY04 - <i>R. orientalis</i>         | 228 | IALVEGAER | TKTPNEIALTVLL  | AVLTQVFLVAVATIPPIAHYVGGSP | 273      |         |     |
| B5EH79 - <i>G. bemidjiensis</i>       | 207 | ISLIEGAKR | RRKTPNEIALEVLL | IALTIVFLLVCANISPLSVYSVKA  | 256      |         |     |
| Q9R6X1 - <i>Anabaena sp.</i>          | 226 | IALVEGAER | TKTPNEI        | VALTVLLAVLSLVFLFVAVATLP   | FAIYADTP | 271     |     |
| Q8A520 - <i>B. thetaiotaomicron</i>   | 201 | IALVEGASR | RQKTPNEIALTILL | AGFTLVFVIVCVTLKPFADYSNTV  | 246      |         |     |
| Q97BF6 - <i>T. volcanium</i>          | 195 | IELVEKSTR | EKTPNEISLTVFL  | SGLTLIFLVI                | TASIFAI  | SHYFGRT | 240 |
| Q5KUV4 - <i>G. kaustophilus</i>       | 202 | ISLVEGATR | RQKTPNEIALNILL | VTLTLIFLIVVTLVPIARYVGIH   | 247      |         |     |
| Q1IUD4 - <i>K. versatilis</i>         | 198 | IALVEGAER | RQKTPNEIALNILL | AGLTLIFLLAVVTLQPF         | FAIYSGAQ | 243     |     |
| 229 Q74AA9 - <i>G. sulfurreducens</i> | 207 | ISMIEGAKR | RRKTPNEIALEVLL | IALTIVFLLVCANISPLSVYSVRA  | 252      |         |     |

230 Supplementary Figure 15. **Sequence alignment of KdpB sequences around KdpB<sub>F232</sub>.** KdpB  
231 sequences from different species, listed by UNIPROT accession number and species, were aligned  
232 using Clustal Omega<sup>89</sup> and colored by degree of conservation compared to *E. coli* KdpB (dark  
233 green – highly conserved; red – not conserved). Species were chosen to reflect the range of  
234 genetic diversity, including gram-negative and gram-positive bacteria<sup>15</sup>. The highly conserved  
235 KdpB<sub>F232</sub> is indicated by the pink marker.

|                                        | <b>KdpFAB<sub>D307N</sub>C</b><br><b>E1·ATP</b><br><b>(EMD-12478)</b><br><b>(PDB 7NNL)</b> | <b>KdpFAG<sub>232D</sub>B<sub>S162A</sub>C</b><br><b>E1·ATP</b><br><b>(EMDB-12482)</b><br><b>(PDB 7NNP)</b> |
|----------------------------------------|--------------------------------------------------------------------------------------------|-------------------------------------------------------------------------------------------------------------|
| <b>Data collection and processing</b>  |                                                                                            |                                                                                                             |
| Magnification                          | 49,407                                                                                     | 49,407                                                                                                      |
| Voltage (keV)                          | 200                                                                                        | 200                                                                                                         |
| Electron exposure (e-/Å <sup>2</sup> ) | 52                                                                                         | 52                                                                                                          |
| Defocus range (μm)                     | -0.5 to -2.0                                                                               | -0.5 to -2.0                                                                                                |
| Pixel size (Å)                         | 1.012                                                                                      | 1.012                                                                                                       |
| Symmetry imposed                       | C1                                                                                         | C1                                                                                                          |
| Initial particle images (no.)          | 331,673                                                                                    | 756,834                                                                                                     |
| Final particle images (no.)            | 160,776                                                                                    | 196,682                                                                                                     |
| Map resolution (Å)                     | 3.1                                                                                        | 3.2                                                                                                         |
| FSC threshold                          | 0.143                                                                                      | 0.143                                                                                                       |
| Map resolution range (Å)               | 2.9-4.7                                                                                    | 3.1-5                                                                                                       |
| <b>Refinement</b>                      |                                                                                            |                                                                                                             |
| Initial model used (PDB code)          | 6HRA                                                                                       | 6HRA                                                                                                        |
| Model resolution (Å)                   | 3.3                                                                                        | 3.4                                                                                                         |
| FSC threshold                          | 0.5                                                                                        | 0.5                                                                                                         |
| Model resolution range (Å)             | 80-3.1                                                                                     | 80-3.2                                                                                                      |
| Sharpening B-factor (Å <sup>2</sup> )  | -92                                                                                        | -130                                                                                                        |
| Model composition                      |                                                                                            |                                                                                                             |
| Non-hydrogen atoms                     | 11099                                                                                      | 11096                                                                                                       |
| Protein residues                       | 1456                                                                                       | 1456                                                                                                        |
| Ligands                                | K: 10<br>CDL: 2<br>ACP: 1                                                                  | Rb: 8<br>CDL: 2<br>ACP: 1                                                                                   |
| B factors (Å <sup>2</sup> )            |                                                                                            |                                                                                                             |
| Protein                                | 59.9                                                                                       | 43.6                                                                                                        |
| Ligand                                 | 58.7                                                                                       | 42.3                                                                                                        |
| R.m.s. deviations                      |                                                                                            |                                                                                                             |
| Bond lengths (Å)                       | 0.005                                                                                      | 0.005                                                                                                       |
| Bond angles (°)                        | 1.078                                                                                      | 1.111                                                                                                       |
| Validation                             |                                                                                            |                                                                                                             |
| MolProbity Score                       | 1.58                                                                                       | 1.52                                                                                                        |
| Clash score                            | 6.05                                                                                       | 5.43                                                                                                        |
| Poor rotamers, %                       | 0.00                                                                                       | 0.00                                                                                                        |
| Ramachandran plot                      |                                                                                            |                                                                                                             |
| Favored (%)                            | 96.26                                                                                      | 96.48                                                                                                       |
| Allowed (%)                            | 3.52                                                                                       | 3.52                                                                                                        |
| Outliers (%)                           | 0.00                                                                                       | 0.00                                                                                                        |

238 Supplementary Table 2. **Protein-ion interactions in K<sup>+</sup>- and Rb<sup>+</sup>-loaded KdpFABC.** Distances  
 239 in Å between coordinating atoms and ions in [7NNL] and [7NNP]. Ions not present in one  
 240 structure are denoted with N/A. For ions where one structure yielded more coordinating  
 241 moieties than the other structure, rows for missing coordinators are marked X.

| Ion | K <sup>+</sup> -loaded [7NNL] |         |      |              | Rb <sup>+</sup> -loaded [7NNP] |         |      |              |
|-----|-------------------------------|---------|------|--------------|--------------------------------|---------|------|--------------|
|     | Chain                         | Residue | Atom | Distance [Å] | Chain                          | Residue | Atom | Distance [Å] |
| S1  | A                             | N114    | O    | 2.89         | N/A                            |         |      |              |
|     | A                             | G232    | O    | 2.88         |                                |         |      |              |
|     | A                             | N239    | ND2  | 2.94         |                                |         |      |              |
|     | A                             | G345    | O    | 3.13         |                                |         |      |              |
|     | A                             | G468    | O    | 2.83         |                                |         |      |              |
| S3  | A                             | N112    | O    | 2.70         | A                              | N112    | O    | 2.73         |
|     | A                             | T113    | O    | 2.89         | A                              | T113    | O    | 3.24         |
|     | A                             | T230    | O    | 3.60         | A                              | T230    | O    | 3.21         |
|     | A                             | N231    | O    | 2.72         | A                              | D232    | N    | 3.36         |
|     | A                             | S343    | O    | 2.73         | A                              | D232    | OD2  | 6.10         |
|     | A                             | C344    | O    | 2.83         | A                              | S343    | O    | 2.75         |
|     | A                             | N466    | O    | 3.49         | A                              | C344    | O    | 2.71         |
|     | A                             | N467    | O    | 2.76         | A                              | N466    | O    | 3.05         |
| X   | X                             | X       | X    | A            | N467                           | O       | 2.83 |              |
| S4  | A                             | N112    | O    | 3.83         | A                              | N112    | O    | 3.62         |
|     | A                             | N112    | ND2  | 3.10         | A                              | N112    | ND2  | 2.87         |
|     | A                             | S343    | OG1  | 2.81         | A                              | T230    | O    | 3.81         |
|     | A                             | S378    | OG1  | 3.01         | A                              | S343    | O    | 3.34         |
|     | A                             | N466    | O    | 3.55         | A                              | S343    | OG   | 2.75         |
|     | A                             | R493    | NH1  | 3.45         | A                              | N466    | O    | 3.34         |
|     | X                             | X       | X    | X            | A                              | R493    | NH1  | 4.40         |
| T1  | A                             | Y381    | OH   | 3.13         | A                              | S343    | OG   | 3.73         |
|     | X                             | X       | X    | X            | A                              | S378    | OG   | 3.62         |
|     | X                             | X       | X    | X            | A                              | N465    | O    | 2.99         |
| T2  | A                             | G369    | O    | 2.90         | A                              | G369    | O    | 2.93         |
|     | A                             | S378    | O    | 3.42         | X                              | X       | X    | X            |
| T3  | A                             | A420    | O    | 3.08         | N/A                            |         |      |              |
|     | A                             | T424    | OG1  | 2.91         |                                |         |      |              |
| T4  | A                             | Q367    | O    | 3.89         | A                              | Ile368  | O    | 3.80         |
|     | A                             | I368    | O    | 4.00         | X                              | X       | X    | X            |
| T5  | A                             | I421    | O    | 3.75         | X                              | X       | X    | X            |
| T6  | X                             | X       | X    | X            | X                              | X       | X    | X            |
| CBS | B                             | C261    | O    | 3.35         | B                              | V260    | O    | 3.82         |
|     | B                             | I263    | O    | 3.89         | B                              | C261    | O    | 3.17         |
|     | B                             | T266    | OG1  | 3.93         | B                              | I263    | O    | 2.76         |
|     | B                             | S579    | O    | 3.80         | B                              | T265    | N    | 3.57         |
|     | B                             | D583    | OD1  | 3.80         | B                              | T265    | OG1  | 3.10         |
|     | B                             | K586    | NZ   | 2.98         | B                              | N624    | ND2  | 2.87         |

242

91. Becker, D., Fendler, K., Altendorf, K. & Greie, J. C. The conserved dipole in transmembrane helix 5 of KdpB in the Escherichia coli KdpFABC P-type ATPase is crucial for coupling and the electrogenic K<sup>+</sup>-translocation step. *Biochemistry* 46,13920–13928 (2007).
